# Supplementary material for: Lactiplantibacillus plantarum Lp20 Alleviates High Fat Diet-Induced Obesity in Mice via Its Bile Salt Hydrolase Activity
Source: Preprints.org preprint supplement (doi:10.20944/preprints202406.0235.v1), 2024-06-05
Supplement: Supplementary file 1 [file supplementary]

*Supplementary Material*

***Lactiplantibacillus plantarum* Lp20 alleviates high fat diet-induced obesity in mice via its bile salt hydrolase activity**

**Fangzhou Lu1, Hui Wang1,** **Haidong Qian2, Zhengyuan Zhai 1,3 *and Yanling Hao 2,** *

1 College of Food Science and Nutritional Engineering, China Agricultural University, Beijing 100083, China.

2 Key Laboratory of Precision Nutrition and Food Quality, Department of Nutrition and Health, China Agricultural University, Beijing 100190, China.

3 Food Laboratory of Zhongyuan, Luohe 462300, Henan, China.

**1. Supplementary Tables**

**Table S1.** Bacteria strains and plasmids used in this study

| **Strains and plasmids** | **Relevant characteristics** | **Source** |
| --- | --- | --- |
| **Strains** | | |
| *Lp. plantarum* WCFS1 | Standard strain of *Lactiplantibacillus plantarum*, used as control strain to determine bile salt clearance rate of BSH | Given by Professor William de Wos |
| *Lp. plantarum* Lp1, Lp2, Lp3, Lp4, Lp5, Lp92, Lp93, Lp97 | Candidate strain | Isolated from fermented dairy products in Yunnan and preserved by our laboratory |
| *Lp. plantarum* Lp20 | Candidate strain. Host strain for deletion mutant | Isolated from fermented dairy products in Yunnan and preserved by our laboratory |
| *Lp. plantarum* Y03, Y08 | Candidate strain | Given by Professor Yang Yao |
| *Lp. plantarum* Lp200, Lp278, Lp281, Lp282, Lp283, Lp286, Lp288 | Candidate strain | Laboratory collection |
| *Lp. plantarum* Lp255, Lp256 | Candidate strain | Isolated from fermented food in Anhui and preserved by our laboratory |
| *Lp. plantarum* Lp258, Lp260 | Candidate strain | Isolated from fermented dairy products in Inner Mongolia and preserved by our laboratory |
| *Lp. plantarum* Lp261 | Candidate strain | Isolated from fermented dairy products in Gansu and preserved by our laboratory |
| *Lp. plantarum* Lp271 | Candidate strain | Isolated from fermented dairy products in Qinghai and preserved by our laboratory |
| *Lp. plantarum* Lp272, Lp274 | Candidate strain | Isolated from fermented Sauerkraut in Heilongjiang and preserved by our laboratory |
| *Lp. plantarum* Lp277 | Candidate strain | Isolated from fermented products in Tianjin and preserved by our laboratory |
| *L. lactic* NZ9000 | Plasmid-free derivative of *L. lactis* MG1363 *pepN*::*nisRK*. Host strain for pNZ vectors | Laboratory collection |
| *E. coli* DH5α | F-ϕ80d*lac*ZΔM15, Δ (*lacZYA–argF*) U169, *deoR, recA1, endA1, hsdR17* (rK-, mK-), *phoA, supE44, λ-, thi-1, gyrA96, relA1.* Host strain for pUC vectors | TIANGEN |
| *Lp. plantarum* Lp20 *Δbsh1* | *bsh1* gene deletion mutant of *Lp. plantarum* Lp20. Host strain for pNZ11, *Cm*R. | This work |
| *Lp. plantarum* Lp20 *Δbsh1* | *Lp. plantarum* Lp20-*Δbsh1* with pNZ11 as control strain | This work |
| *Lp. plantarum* Lp20 *Δbsh1* + | *Lp. plantarum* Lp20-*Δbsh1* with pNZbsh1 | This work |
| **Plasmids** |  |  |
| pUC19E | Suicide plasmid carried a *Em*R cassette, derivative of pUC19, *Amp*R, *Em*R | Laboratory collection |
| pUCbsh1arm | pUC19E containing the homologous arms of *bsh1* gene of *Lp. plantarum* Lp20, *Amp*R, *Em*R | This work |
| pNZ11 | pNZ8148 derivative carrying P11 promoter instead of PnisApromoter, *Cm*R | Laboratory collection |
| pNZbsh1 | pNZ11 containing the *bsh1* gene of *Lp. plantarum* Lp20, *Cm*R | This work |

*Amp*R, ampicillin resistance; *Em*R, erythromycin resistance; *Cm*R, chloramphenicol resistance.

**Table S2.** Primers used in this study

| **Primer pair** | **Sequence (5’-3’)** |
| --- | --- |
| Lp20_GM1654L-F  Lp20_GM1654L-R | aaaacgacggccagtgaattcGATCATGTTGTTAAACTCACTTACGATAA  ggaggattactatttAAGCCACTACTGTAATAGTTAAAATTGTTT |
| Lp20_GM1654R-F  Lp20_GM1654R-R | ggcttAAATAGTAATCCTCCTCGAAAATAATATTT  cttctgcaggtcgactctagaCGGCCGACCGTAATATTGG |
| pUC antilinear-F  pUC antilinear-R | AATTCACTGGCCGTCGTTTTACAAC  AGTCGACCTGCAGAAGAGGAT |
| Up-F  Up-R | CGATGCTCAAGATGATCAATAC  CATTGTTATATCGGCTATAAGGGTTAC |
| Down-F  Down-R | CATCTAGTGTCATATTAACAGCAATG  GAATGGAACAATTACACAATTACCG |
| NcoI-bsh1 | catgCCATGGGGTGTACTGCCATAACTTATCAATCTTA |
| SacI-bsh1 | cGAGCTCTTAGTTAACTGCATAGTATTGTGCTTCTG |

**Table S3.** Mice average daily energy intake during the modeling period (1-12 weeks).

|  | **Average energy intake**  （kcal·day-1 per mouse） | |
| --- | --- | --- |
| **Weeks** | **LFD** | **HFD** | |
| **1** | 14.49 | 14.85 | |
| **2** | 13.08 | 13.40 | |
| **3** | 12.80 | 13.67 | |
| **4** | 12.39 | 13.86 | |
| **5** | 12.60 | 13.59 | |
| **6** | 12.88 | 13.87 | |
| **7** | 13.07 | 14.11 | |
| **8** | 12.27 | 13.99 | |
| **9** | 12.76 | 14.77 | |
| **10** | 12.60 | 15.24 | |
| **11** | 12.55 | 14.48 | |
| **12** | 12.62 | 15.50 | |

**Table S4.** Mice average daily energy intake during treatment (13-20 weeks).

|  | **Average energy intake**  （kcal·day-1 per mouse） | | | |
| --- | --- | --- | --- | --- |
| **Weeks** | **LFD** | **HFD** | **HFD+Lp20-WT** | **HFD+Lp20-*Δbsh1*** | |
| **13** | 12.77 | 15.01 | 14.09 | 14.32 | |
| **14** | 13.20 | 15.45 | 15.55 | 14.84 | |
| **15** | 11.35 | 14.94 | 15.66 | 15.29 | |
| **16** | 11.74 | 14.73 | 15.31 | 15.07 | |
| **17** | 12.18 | 14.33 | 14.72 | 14.33 | |
| **18** | 12.36 | 15.42 | 14.98 | 13.94 | |
| **19** | 12.79 | 14.56 | 14.30 | 14.75 | |
| **20** | 12.52 | 15.12 | 14.75 | 14.41 | |

**Table S5.** Liver weight and liver index (Mean and standard deviation) of mice after 8 weeks of intervention.

|  | Liver weight(g) | | Liver index (%) | |
| --- | --- | --- | --- | --- |
| Group | Mean | SD | Mean | SD |
| LFD | 1.19c | 0.10 | 3.93a | 0.20 |
| HFD | 1.97a | 0.23 | 4.01a | 0.35 |
| HFD + Lp20-WT | 1.20c | 0.19 | 2.88b | 0.29 |
| HFD + Lp20-*Δbsh1* | 1.68b | 0.14 | 3.56a | 0.24 |

a,b,c,d Different letters in the same column represent significant differences (P < 0.05).

**2. Supplementary Figures**


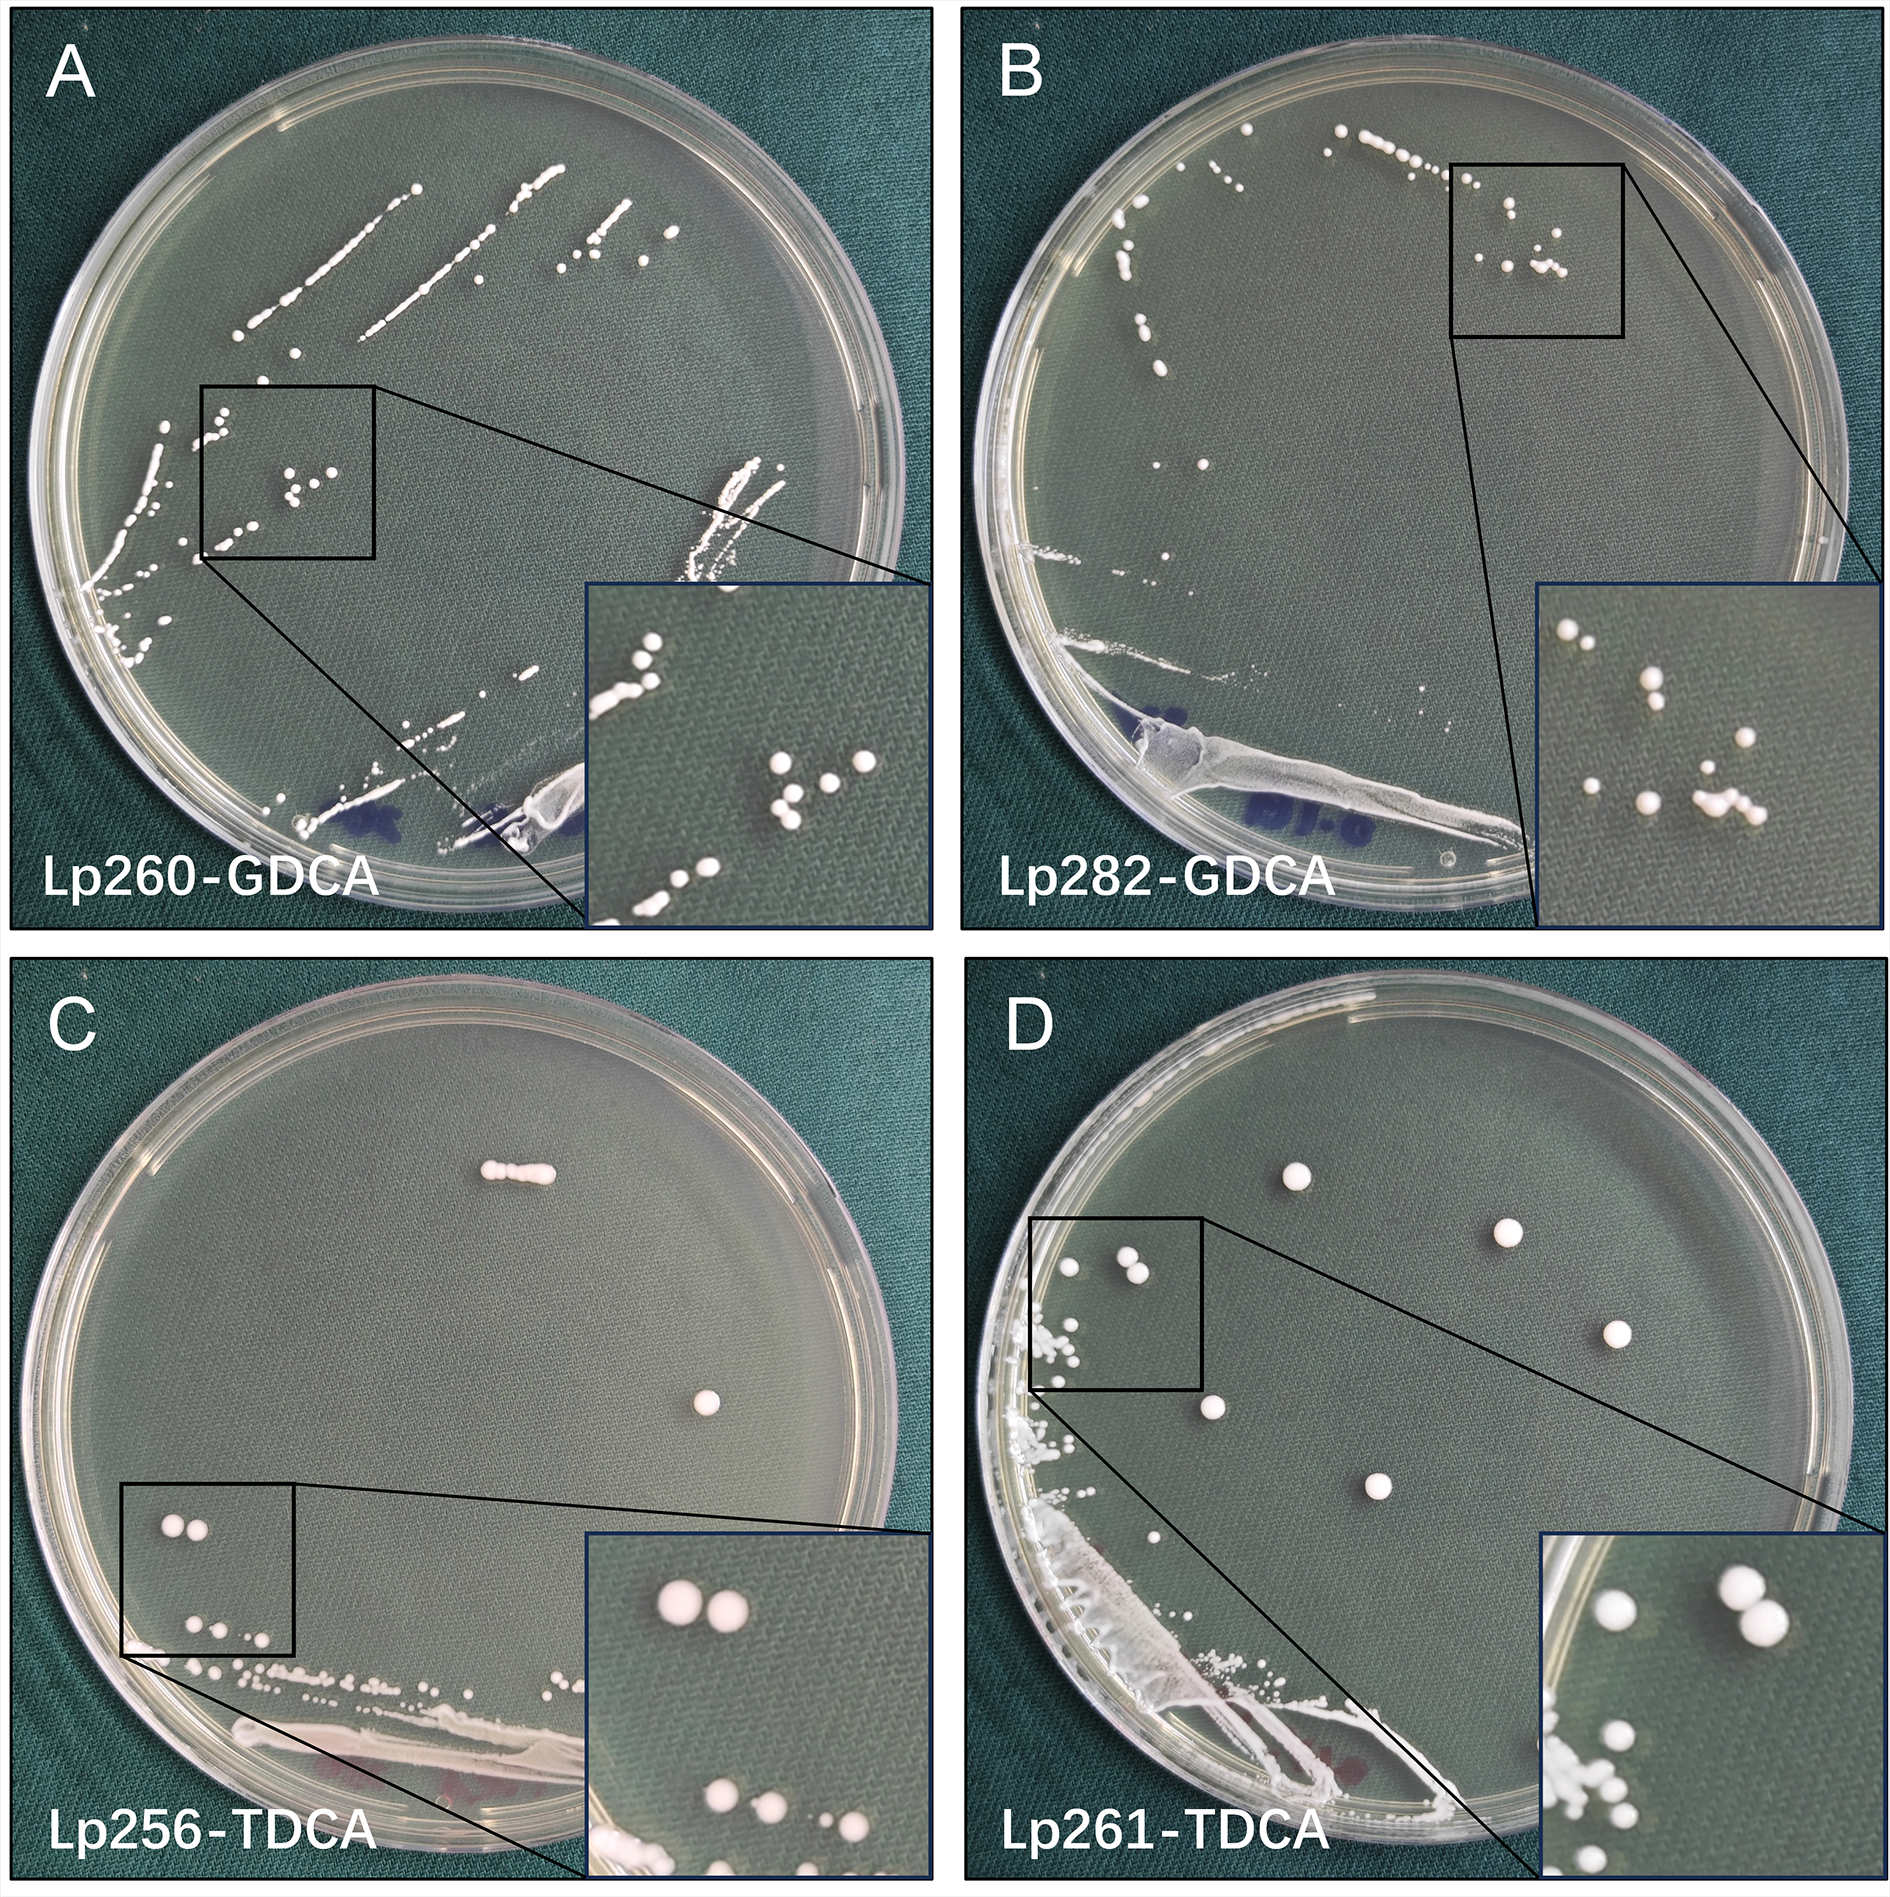


**Figure S1.** Negative results in precipitation halo assay for *Lactiplantibacillus* BSH activity on GDCA plates: *Lp. plantarum* Lp260 (**A**) and *Lp. plantarum* Lp282 (**B**); TDCA plates: *Lp. plantarum* Lp256 (**C**) and *Lp. plantarum* Lp261 (**D**).


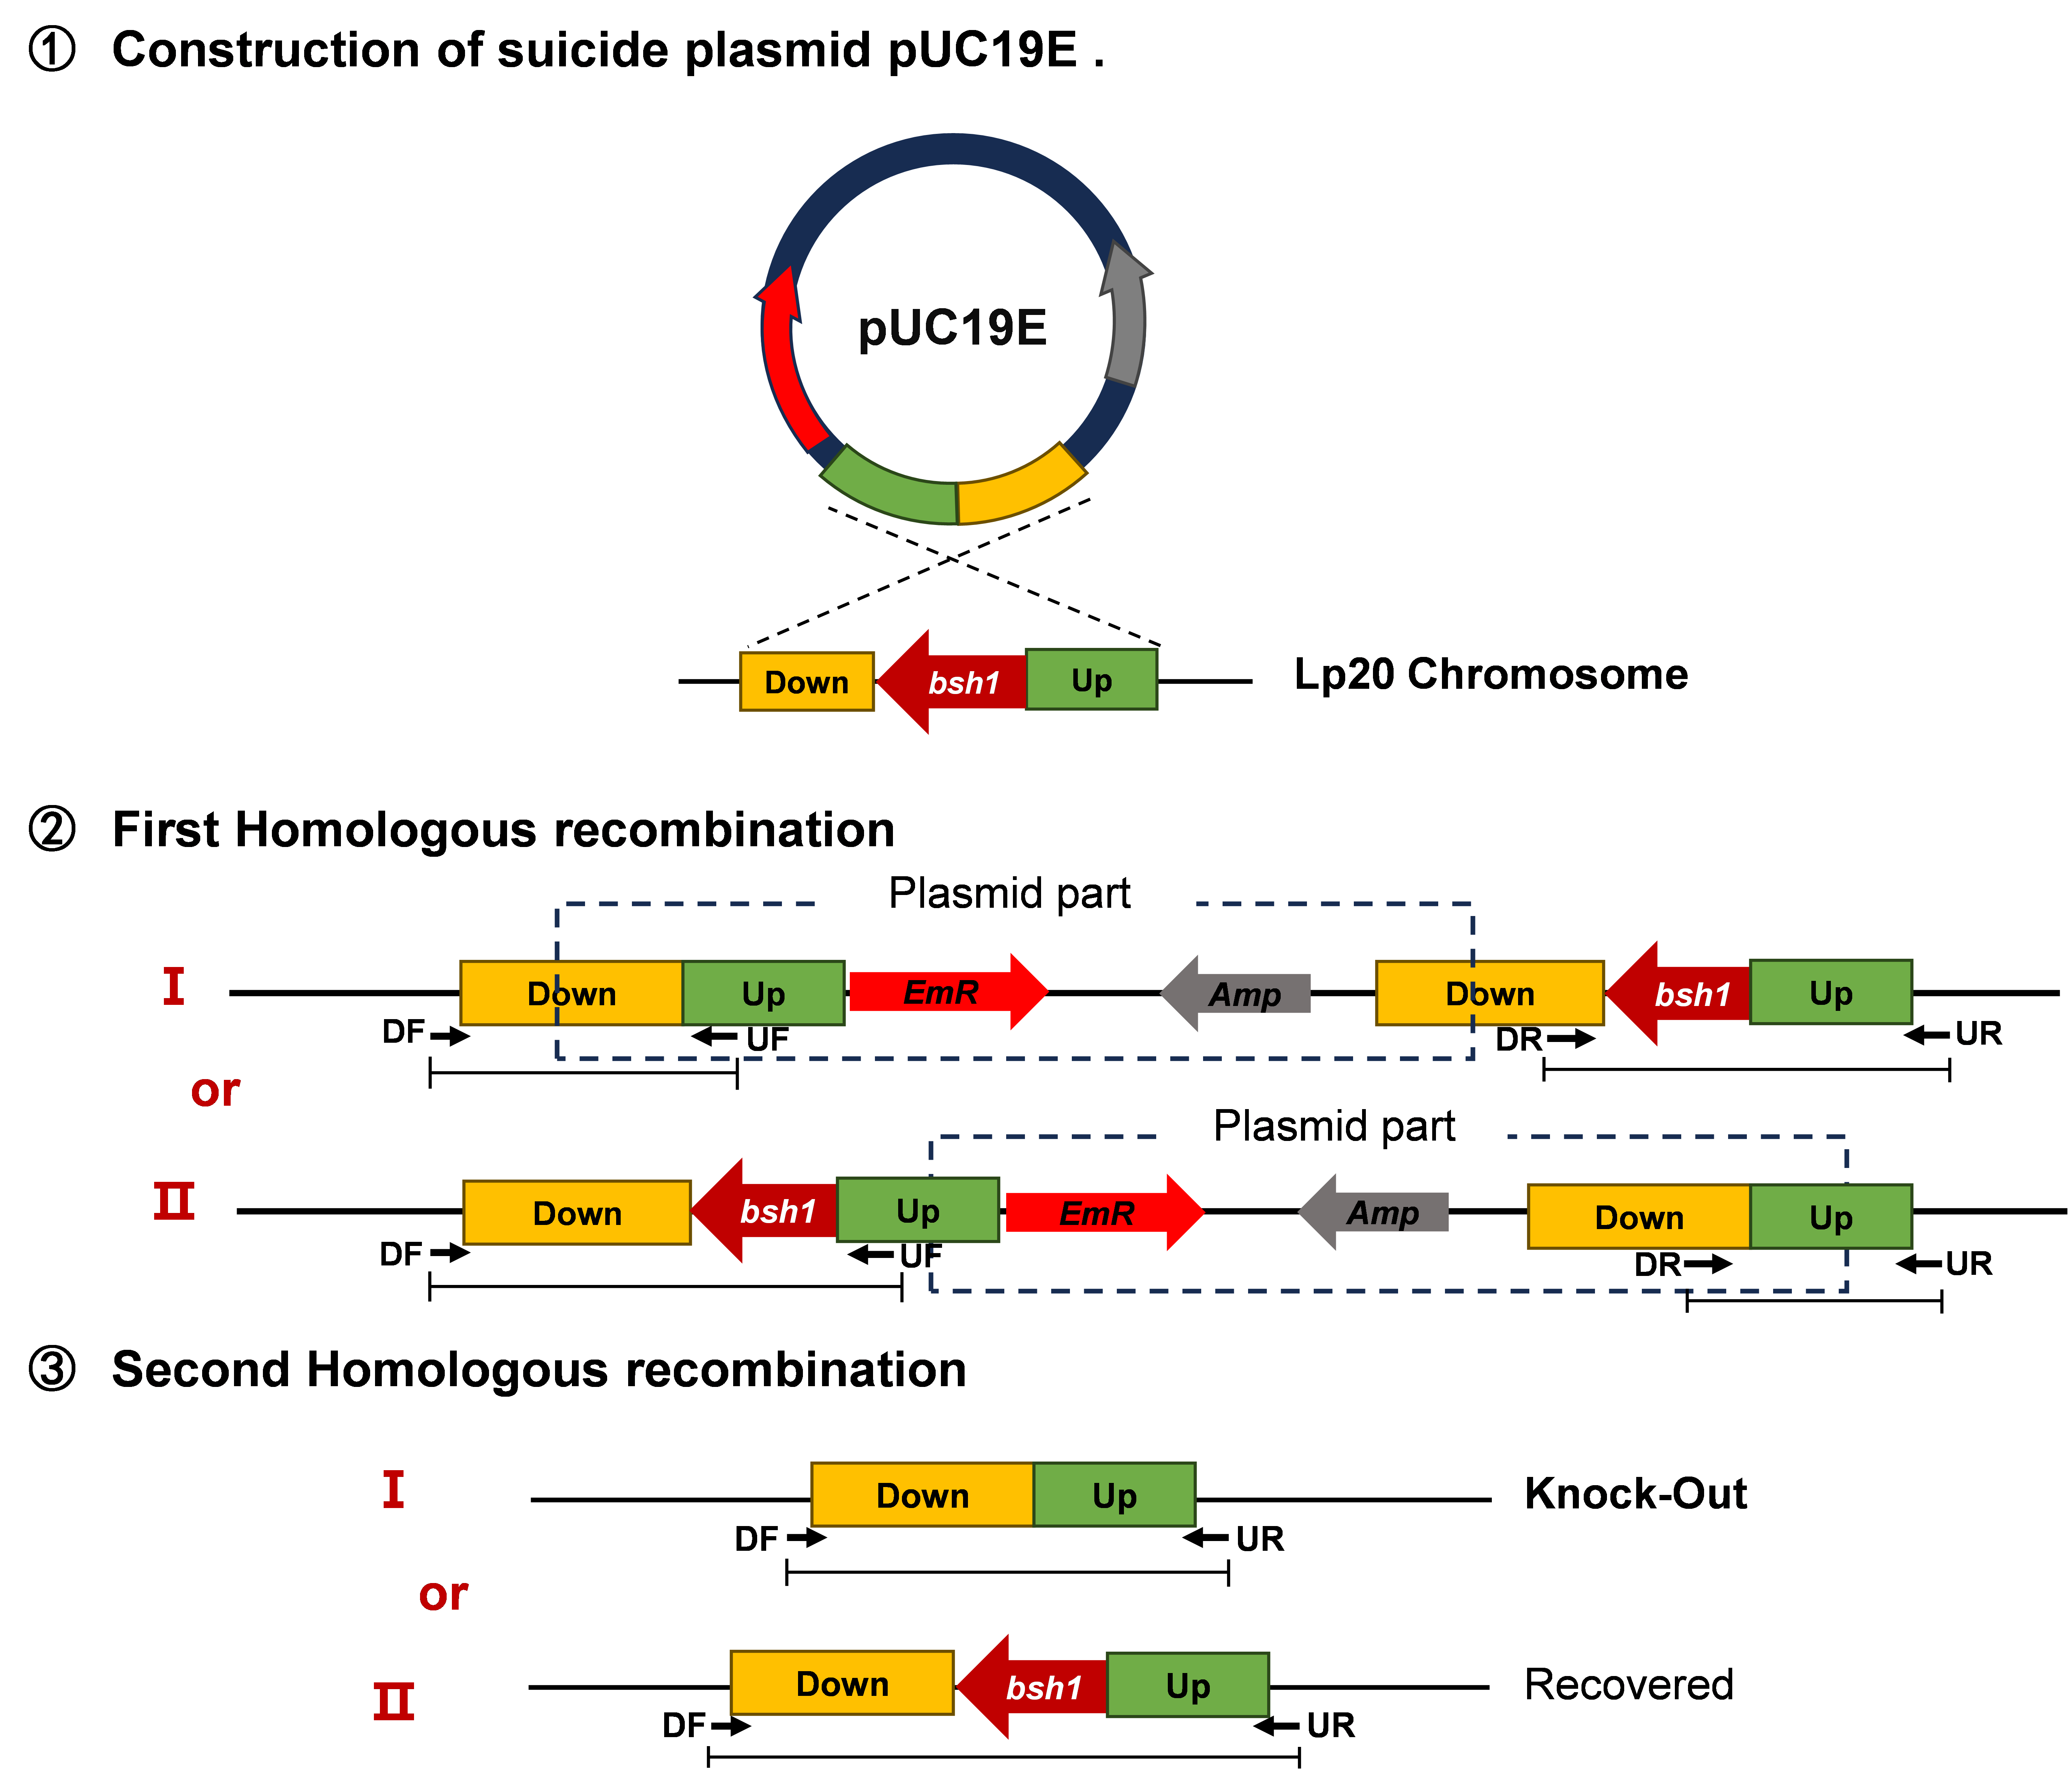


**Figure S2.** A schematic representing the generation of a markerless *bsh1* deletion in *Lp. plantarum* Lp20 using the pUCbsh1arm suicide plasmid. The process involves the following steps: (1) Construction of a suicide plasmid containing homologous flanking fragments of the *bsh1* gene. (2) Integration into the chromosome via the first recombination event in homologous recombination, with primer positions (DF/UF, DR/UR) used for plasmid insertion verification. (3) Selection of double crossover transformants by continuous cultivation in MRS medium without any antibiotics for 10 passages, and the use of primers (DF/UR) to differentiate the deletion mutants from the wild type.


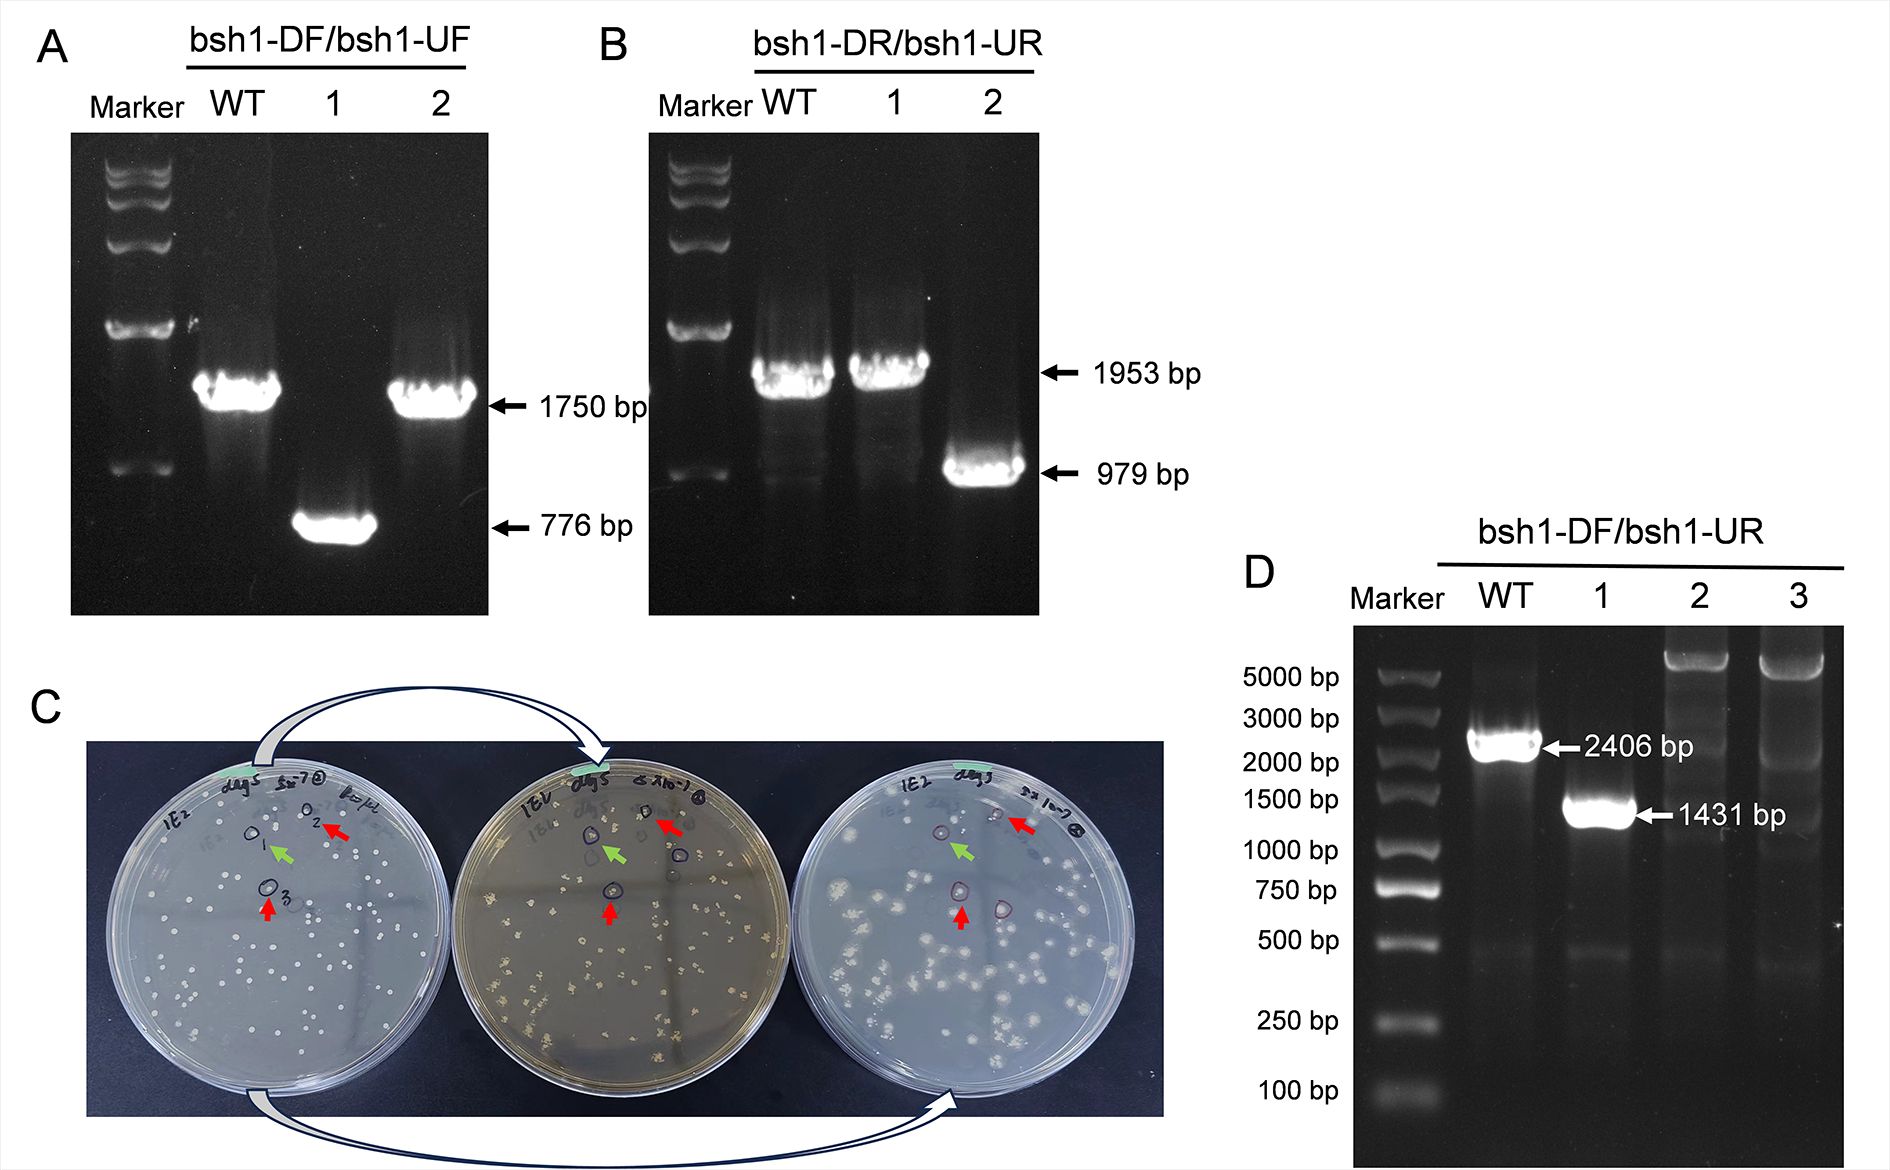


**Figure S3.** Illustrations of the PCR detection of *bsh1* single crossover insertion vectors using primer pairs DF/UF (**A**) and DR/UR (**B**). Marker, DNA Ladder 15,000. WT, wild-type *Lp. plantarum* Lp20 genome used as a template; 1-2 are two single clones selected from the plates following electroporation. (**C**) Bsh1 deleted mutant detection from single-overcrossing strain after continuous passages, imprinted and confirmed on both antibiotic and GDCA agar plates. The second homologous recombination mutants were PCR verified using the primer pair DF/UR in (**D**). 1-3 are three single clones chosen from the double selection imprinting plates as shown in c following the second homologous recombination. WT, wild-type strain *Lp. plantarum* Lp20. Marker, DNA Ladder 5,000.

**
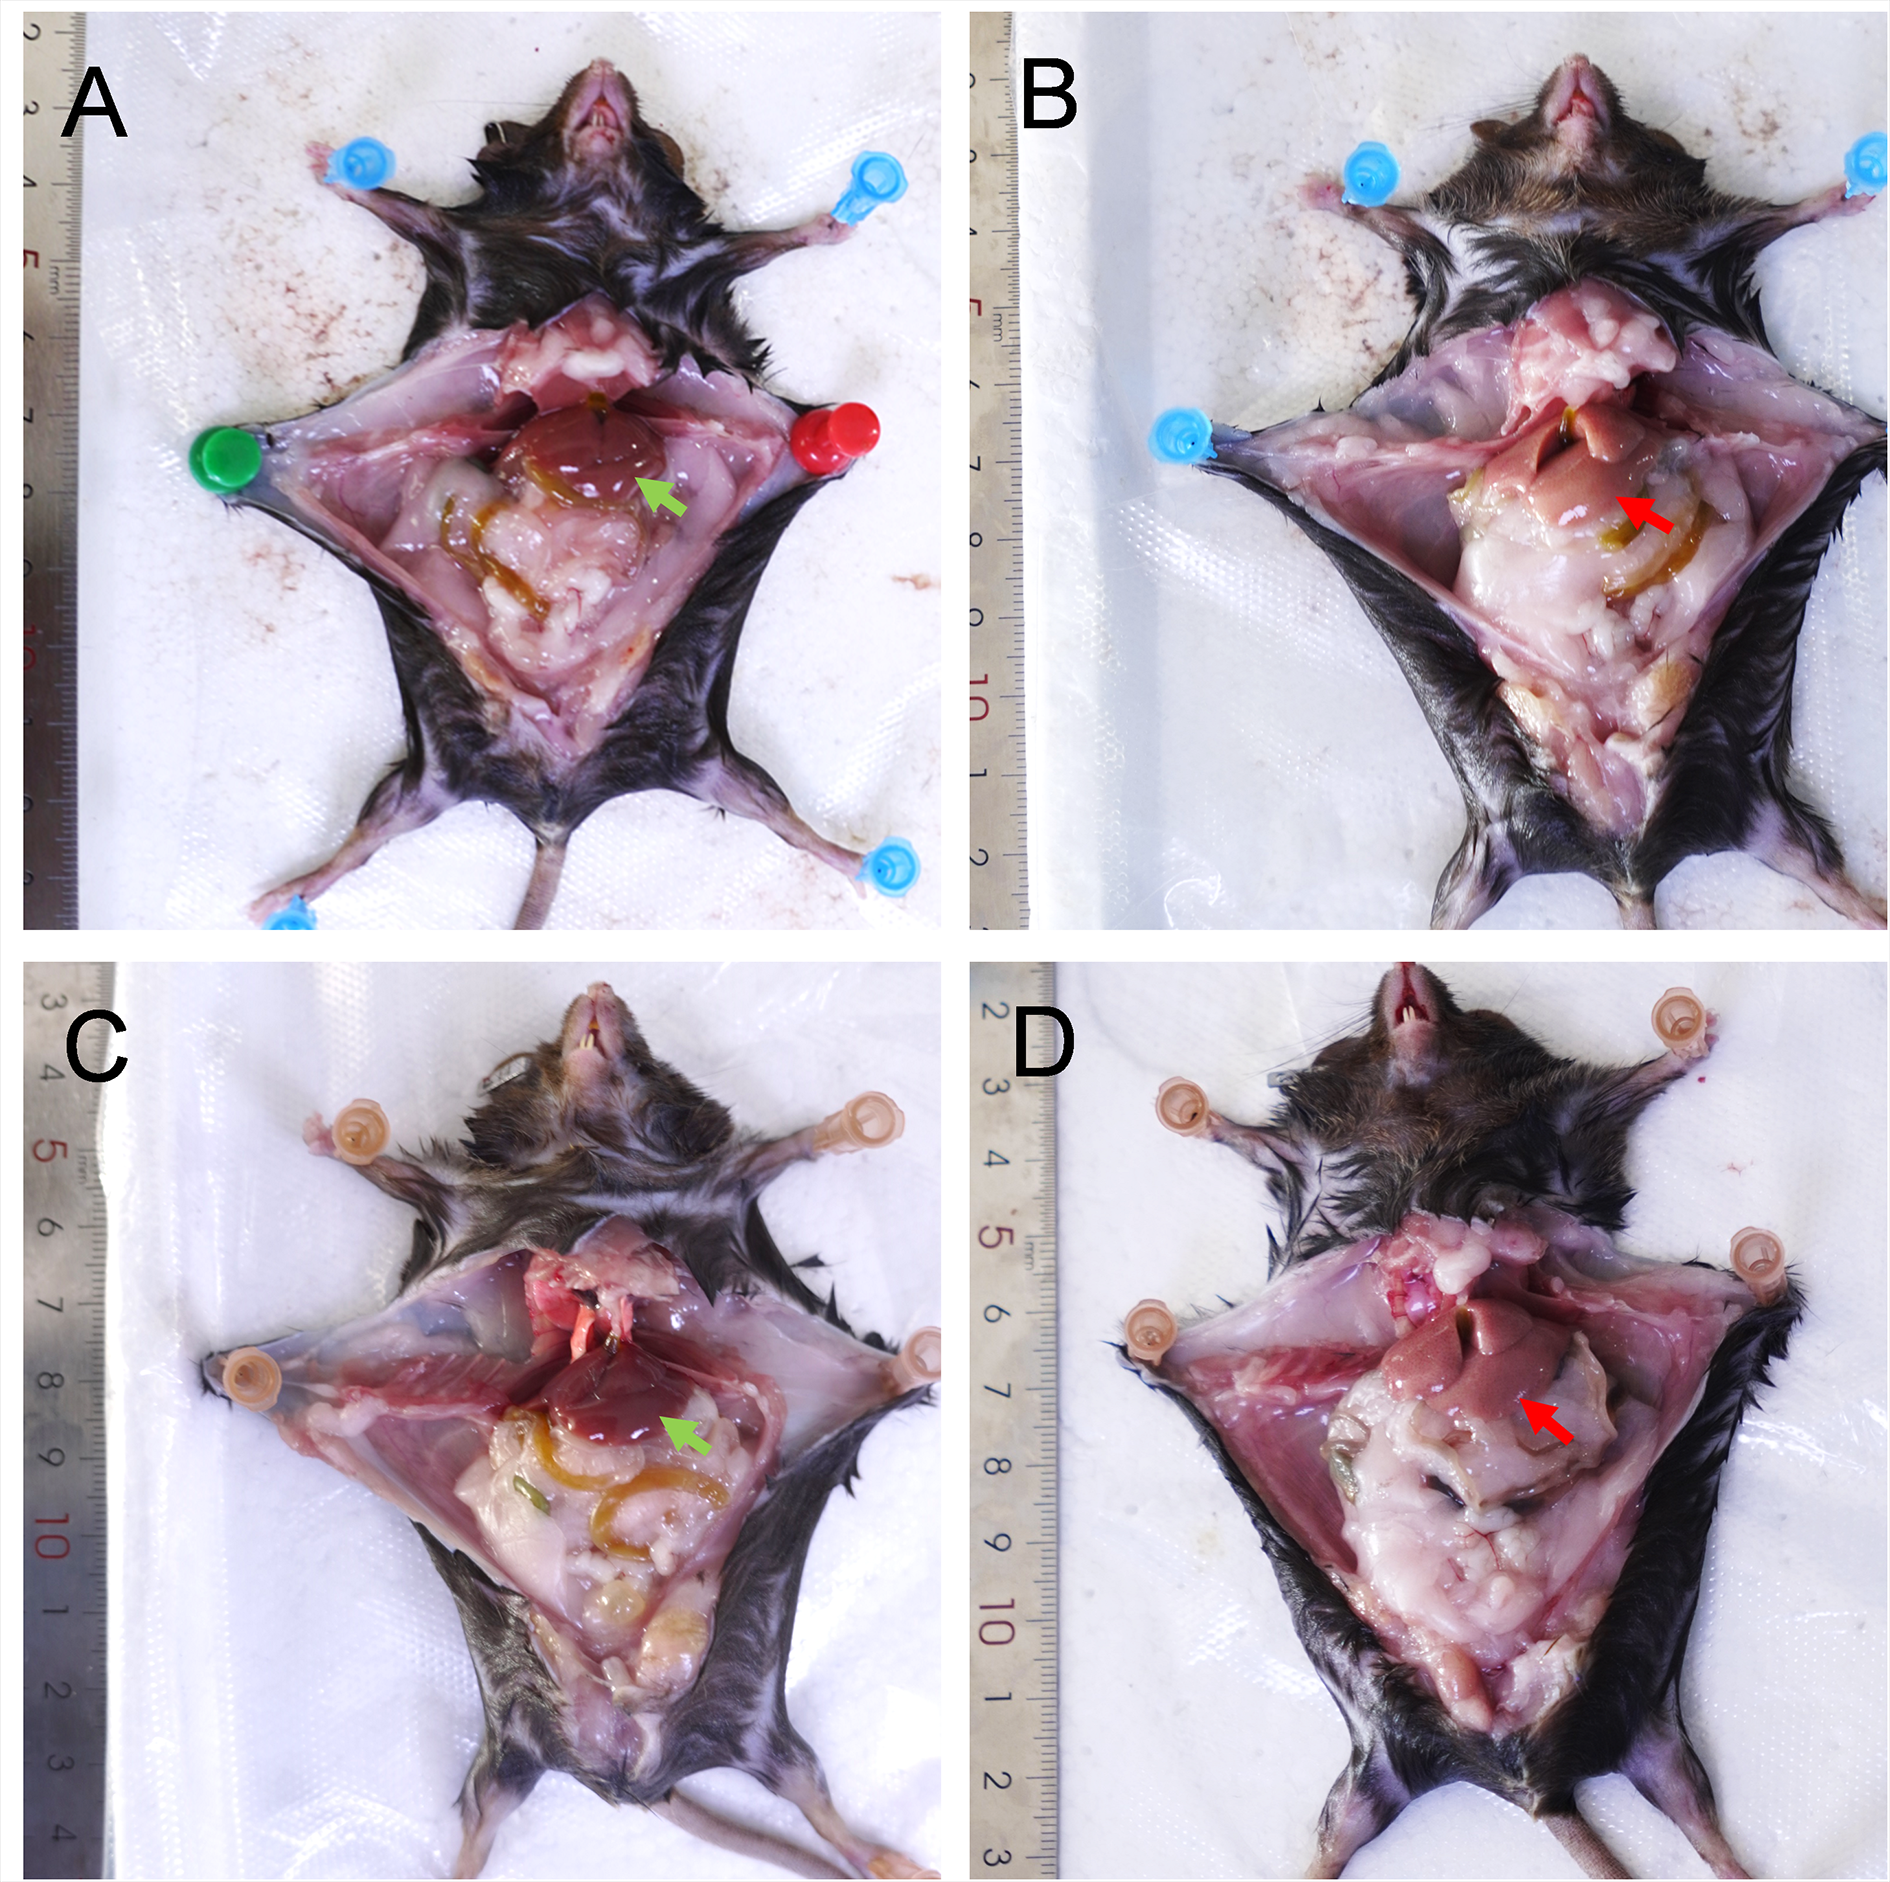
**

**Figure S4.** Fat distribution in abdominal cavity and schematic diagram of liver in mice. (**A**) LFD mice. (**B**) HFD mice. (**C**) HFD +Lp20-WT treated mice. (**D**) HFD + Lp20-*Δbsh1* treated mice.


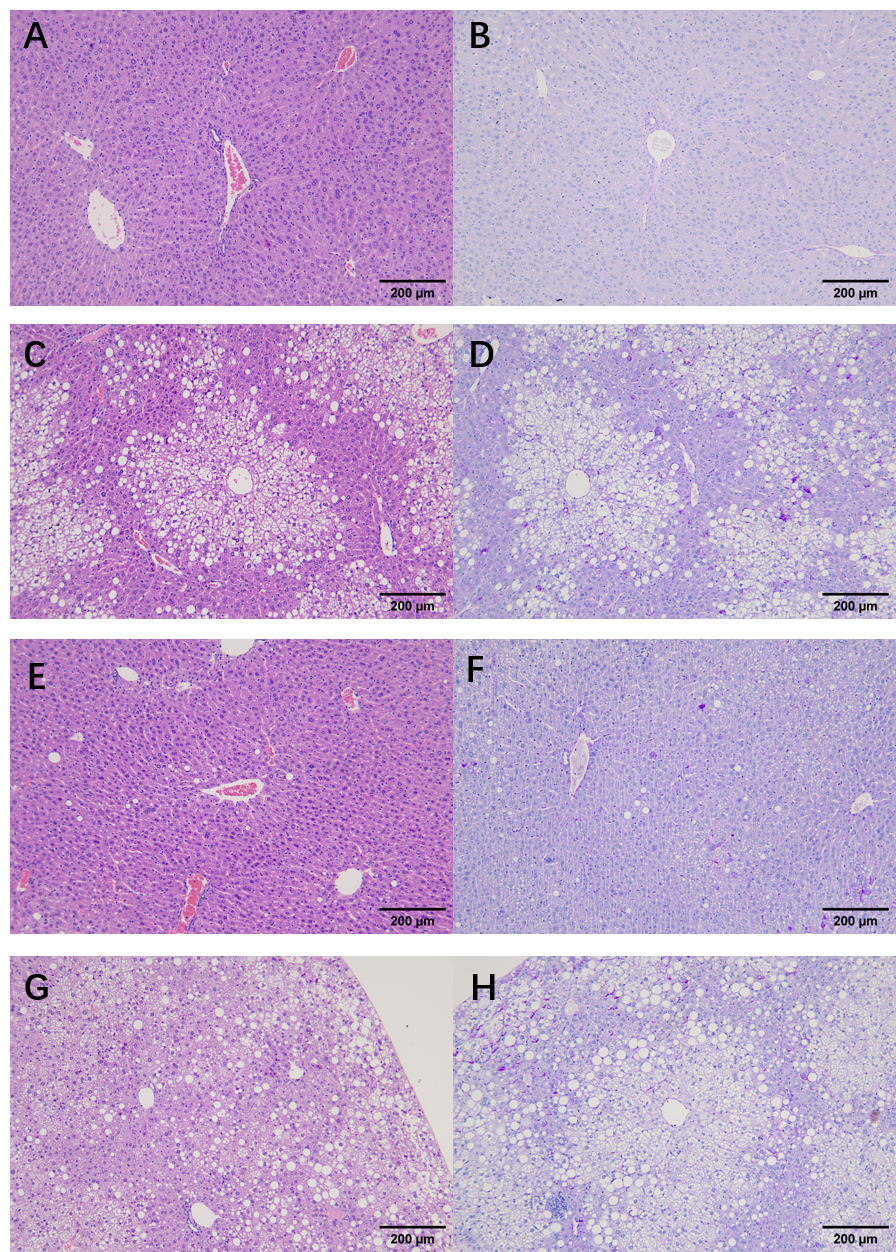


**Figure S5.** The impact of a high-fat diet and *Lp. plantarum* Lp20 bile salt hydrolase on liver damage and steatosis. H&E and PAS stained liver sections from LFD (**A-B**), HFD (**C-D**), HFD+Lp20-WT (**E-F**), and HFD+Lp20-*Δbsh1* (**G-H**) group; Scale bar in the image is 200 μm.
